# Supplementary material for: The prevalence of clinically diagnosed ankylosing spondylitis and its clinical manifestations: a nationwide register study
Source: Springer Nature journal article supplement (doi:10.1186/s13075-015-0627-0), 2015-05-08
Supplement: MOESM1 [file 9783692]

| <b>Additional table 1. Diagnostic codes indicating a diagnosis of AS and AS-related clinical manifestations according to three consecutive Swedish versions of the WHO International Classification of Disease codes</b> |                           |                 |                                 |
|--------------------------------------------------------------------------------------------------------------------------------------------------------------------------------------------------------------------------|---------------------------|-----------------|---------------------------------|
|                                                                                                                                                                                                                          | <b>S-ICD8</b>             | <b>S-ICD9</b>   | <b>S-ICD-10</b>                 |
| <b>Ankylosing spondylitis</b>                                                                                                                                                                                            | 712.40, 726.99            | 720A            | M45                             |
| <b>Anterior uveitis</b>                                                                                                                                                                                                  |                           | 364A-364B       | H20, H221                       |
| <b>Psoriasis</b>                                                                                                                                                                                                         | 696                       | 696             | L40                             |
| <b>Inflammatory bowel disease</b>                                                                                                                                                                                        | 563.00, 563.10,<br>569.02 | 555-556         | K50-K51                         |
| <b>Peripheral arthritis*</b>                                                                                                                                                                                             |                           |                 |                                 |
| <i>Reactive arthritis</i>                                                                                                                                                                                                |                           | 711B, 711D-711W | M013-M029, M036                 |
| <i>Psoriatic arthritis</i>                                                                                                                                                                                               | 696.00                    | 696A, 713D      | L405, M070, M071,<br>M072, M073 |
| <i>Polyarthritis</i>                                                                                                                                                                                                     | 715.99                    | 714X, 716F      | M130                            |
| <i>Other arthritis</i>                                                                                                                                                                                                   |                           | 716F-716X, 714X | M13                             |
| <b>Hip arthroplasty</b>                                                                                                                                                                                                  |                           |                 | NFB, 8,400-8,415,<br>8,419      |

*\*Any of the below*
