# Supplementary material for: The prevalence of clinically diagnosed ankylosing spondylitis and its clinical manifestations: a nationwide register study
Source: Springer Nature journal article supplement (doi:10.1186/s13075-015-0627-0), 2015-05-08
Supplement: MOESM2 [file 9783692]

**Additional figure 1.** The Swedish Healthcare Regions.

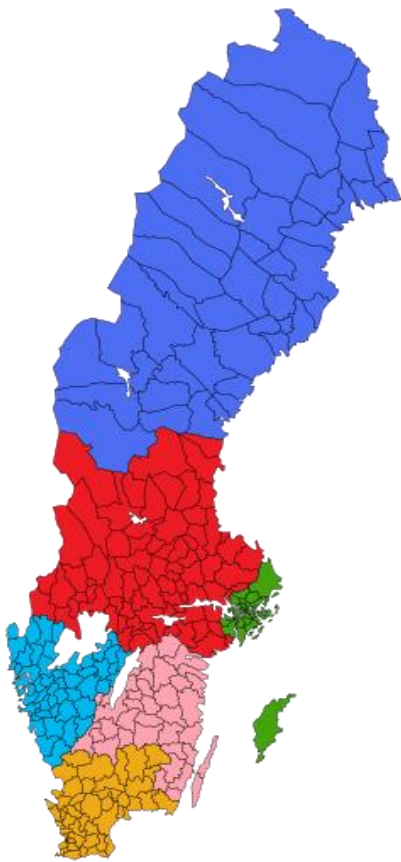

- North healthcare region
- Uppsala-Orebro healthcare region
- Stockholm's healthcare region
- Southeast healthcare region
- West healthcare region
- South healthcare region
