# Supplementary material for: The prevalence of clinically diagnosed ankylosing spondylitis and its clinical manifestations: a nationwide register study
Source: Springer Nature journal article supplement (doi:10.1186/s13075-015-0627-0), 2015-05-08
Supplement: MOESM3 [file 9783692]

**Additional table 2. Demographics, pharmacological treatments, and AS-related clinical manifestations in patients with an AS diagnosis registered in the National Patient Register (NPR) (1967–2009) according to the strict case definition.**

| Strict case definition                                                                                                                                                                                                                                                                                                                                                                                                                                                                                                                                                                                                                                                                                                                                                                                                                                                                                                                                                                                                                                                                                                                                                                                                                                                                                       |                       |                      |                      |
|--------------------------------------------------------------------------------------------------------------------------------------------------------------------------------------------------------------------------------------------------------------------------------------------------------------------------------------------------------------------------------------------------------------------------------------------------------------------------------------------------------------------------------------------------------------------------------------------------------------------------------------------------------------------------------------------------------------------------------------------------------------------------------------------------------------------------------------------------------------------------------------------------------------------------------------------------------------------------------------------------------------------------------------------------------------------------------------------------------------------------------------------------------------------------------------------------------------------------------------------------------------------------------------------------------------|-----------------------|----------------------|----------------------|
|                                                                                                                                                                                                                                                                                                                                                                                                                                                                                                                                                                                                                                                                                                                                                                                                                                                                                                                                                                                                                                                                                                                                                                                                                                                                                                              | Men<br>(N = 5,580)    | Women<br>(N = 2,958) | Total<br>(N = 8,538) |
| <b>Demographics</b>                                                                                                                                                                                                                                                                                                                                                                                                                                                                                                                                                                                                                                                                                                                                                                                                                                                                                                                                                                                                                                                                                                                                                                                                                                                                                          | <b>Mean (SD)</b>      |                      | <b>P-value</b>       |
| Age at diagnosis registration                                                                                                                                                                                                                                                                                                                                                                                                                                                                                                                                                                                                                                                                                                                                                                                                                                                                                                                                                                                                                                                                                                                                                                                                                                                                                | 38.3 (11.0)           | 38.7 (10.8)          | 0.087                |
| Age on December 31, 2009                                                                                                                                                                                                                                                                                                                                                                                                                                                                                                                                                                                                                                                                                                                                                                                                                                                                                                                                                                                                                                                                                                                                                                                                                                                                                     | 48.7 (10.9)           | 48.1 (10.9)          | 0.028                |
| <b>Pharmacological treatment during 2009†</b>                                                                                                                                                                                                                                                                                                                                                                                                                                                                                                                                                                                                                                                                                                                                                                                                                                                                                                                                                                                                                                                                                                                                                                                                                                                                | <b>N (% of total)</b> |                      | <b>P-value†††</b>    |
| NSAIDs                                                                                                                                                                                                                                                                                                                                                                                                                                                                                                                                                                                                                                                                                                                                                                                                                                                                                                                                                                                                                                                                                                                                                                                                                                                                                                       | 3,065 (54.9)          | 1,671 (56.5)         | 0.167                |
| Oral corticosteroids                                                                                                                                                                                                                                                                                                                                                                                                                                                                                                                                                                                                                                                                                                                                                                                                                                                                                                                                                                                                                                                                                                                                                                                                                                                                                         | 634 (11.4)            | 444 (15.0)           | <0.001               |
| sDMARDs                                                                                                                                                                                                                                                                                                                                                                                                                                                                                                                                                                                                                                                                                                                                                                                                                                                                                                                                                                                                                                                                                                                                                                                                                                                                                                      | 1,242 (22.3)          | 695 (23.5)           | 0.194                |
| TNFi                                                                                                                                                                                                                                                                                                                                                                                                                                                                                                                                                                                                                                                                                                                                                                                                                                                                                                                                                                                                                                                                                                                                                                                                                                                                                                         | 1,035 (18.5)          | 407 (13.8)           | <0.001               |
| Any pharmacological treatment                                                                                                                                                                                                                                                                                                                                                                                                                                                                                                                                                                                                                                                                                                                                                                                                                                                                                                                                                                                                                                                                                                                                                                                                                                                                                | 3,895 (69.8)          | 2,079 (70.3)         | 0.644                |
| <b>AS-related clinical manifestations (1967-2009) ††</b>                                                                                                                                                                                                                                                                                                                                                                                                                                                                                                                                                                                                                                                                                                                                                                                                                                                                                                                                                                                                                                                                                                                                                                                                                                                     | <b>N (% of total)</b> |                      | <b>P-value</b>       |
| Anterior uveitis                                                                                                                                                                                                                                                                                                                                                                                                                                                                                                                                                                                                                                                                                                                                                                                                                                                                                                                                                                                                                                                                                                                                                                                                                                                                                             | 1,477 (26.5)          | 632 (21.4)           | <0.001               |
| Psoriasis                                                                                                                                                                                                                                                                                                                                                                                                                                                                                                                                                                                                                                                                                                                                                                                                                                                                                                                                                                                                                                                                                                                                                                                                                                                                                                    | 411 (7.4)             | 258 (8.7)            | 0.026                |
| IBD                                                                                                                                                                                                                                                                                                                                                                                                                                                                                                                                                                                                                                                                                                                                                                                                                                                                                                                                                                                                                                                                                                                                                                                                                                                                                                          | 484 (8.7)             | 262 (8.9)            | 0.775                |
| Peripheral arthritis                                                                                                                                                                                                                                                                                                                                                                                                                                                                                                                                                                                                                                                                                                                                                                                                                                                                                                                                                                                                                                                                                                                                                                                                                                                                                         | 890 (15.9)            | 678 (22.9)           | <0.001               |
| Hip arthroplasty                                                                                                                                                                                                                                                                                                                                                                                                                                                                                                                                                                                                                                                                                                                                                                                                                                                                                                                                                                                                                                                                                                                                                                                                                                                                                             | 418 (7.5)             | 240 (8.1)            | 0.305                |
| <p><b>sDMARDs:</b> methotrexate, sulfasalazine, and leflunomide (according to ATC codes in the prescribed drugs register); <b>Any medicine:</b> NSAIDs, oral corticosteroids, sDMARDs (according to ATC codes in the prescribed drugs register), or TNFi (according to ARTIS); <b>IBD:</b> inflammatory bowel disease (according to ICD-codes in the NPR); <b>Peripheral arthritis:</b> Psoriatic arthritis, reactive arthritis, polyarthritis, or any type of arthritis (according to ICD-codes in the NPR); <b>NSAIDs:</b> Non-steroidal anti-inflammatory drugs; <b>sDMARDs:</b> synthetic disease modifying anti-rheumatic drugs; <b>TNFi:</b> tumor necrosis factor alpha inhibitors.</p> <p>*Data regarding dispensed pharmacologic treatments were obtained from the Swedish prescribed drugs register during 2009. Data regarding TNFi were extracted from the national Swedish Biologics Register (ARTIS) during 2009.</p> <p>†At least one dispensed prescription during 2009 according to the Swedish prescribed drugs register or listed in ARTIS as receiving TNFi medication during 2009.</p> <p>††At least one diagnosis registered in the NPR between 1967 and 2009.</p> <p>†††Adjusted for age and a registered diagnosis of anterior uveitis, psoriasis, IBD, or peripheral arthritis.</p> |                       |                      |                      |
