# Supplementary material for: The prevalence of clinically diagnosed ankylosing spondylitis and its clinical manifestations: a nationwide register study
Source: Springer Nature journal article supplement (doi:10.1186/s13075-015-0627-0), 2015-05-08

**Additional figure 2.** Age- and sex-stratified point prevalence of clinically diagnosed AS in Sweden on December 31, 2009, according to the strict case definition.

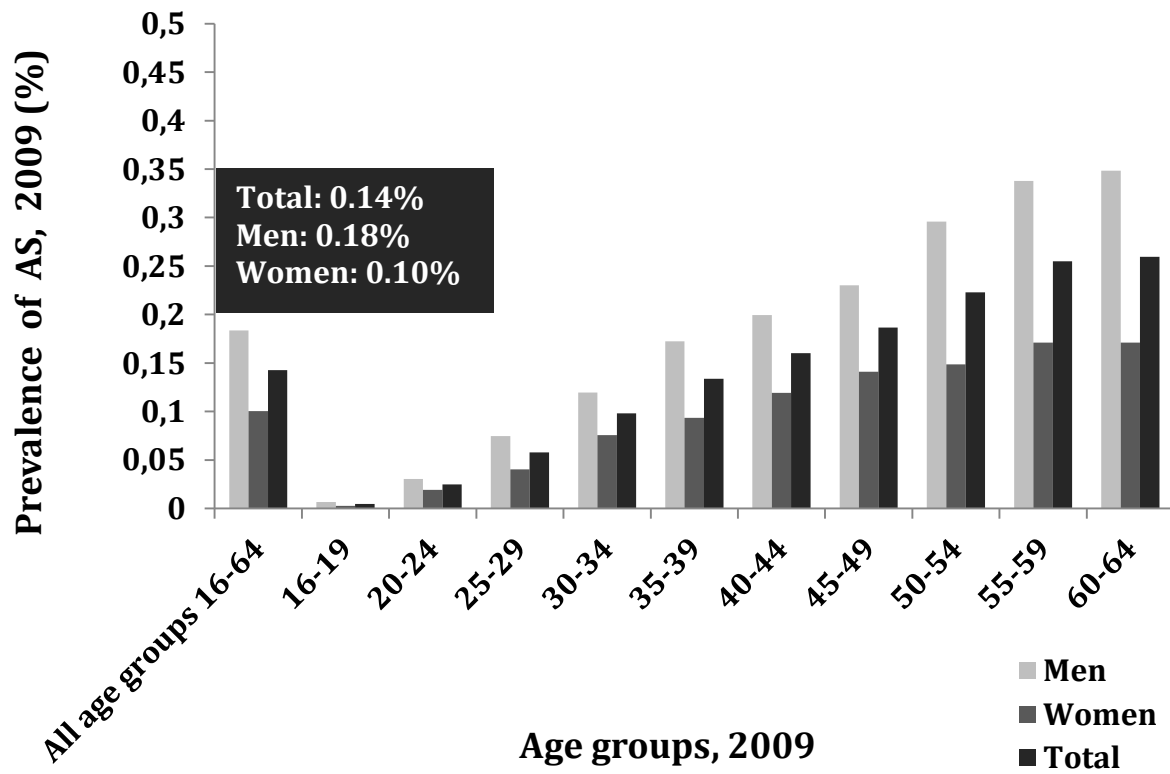

Supplement: MOESM4 [file 9783692]
