# Supplementary material for: The prevalence of clinically diagnosed ankylosing spondylitis and its clinical manifestations: a nationwide register study
Source: Springer Nature journal article supplement (doi:10.1186/s13075-015-0627-0), 2015-05-08

**Additional figure 3.** The point prevalence of clinically diagnosed AS in Sweden on December 31, 2009 (according to the base case definition), among those aged 30–64 years, stratified according to the level of formal education (both crude and standardized according to age and sex).

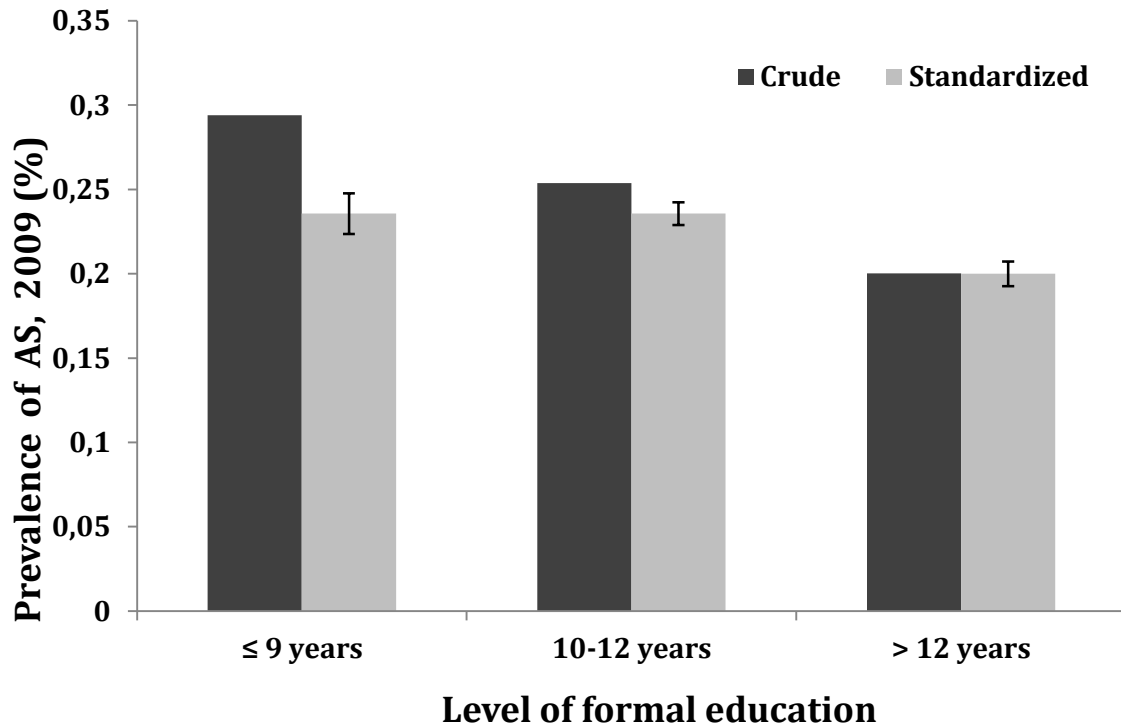

Supplement: MOESM5 [file 9783692]
